# Supplementary material for: Patent Foramen Ovale and Cryptogenic Stroke
Source: Atypon-hosted journal article supplement (doi:10.1056/nejmc073549), 2008-04-02
Supplement: nejm_kent_1518sa1.pdf [file nejm_kent_1518sa1.pdf]

## Supplementary Appendix

This appendix has been provided by the authors to give readers additional information about their work.

Supplement to: Kent DA, Trikalinos TA, Thaler DE. Patent foramen ovale and cryptogenic stroke. *N Engl J Med* 2008;358:1518-21.
